# Supplementary material for: Association of high Plasmodium falciparum parasite densities with polyclonal microscopic infections in asymptomatic children from Toubacouta, Senegal
Source: Springer Nature journal article supplement (doi:10.1186/s12936-019-2684-3), 2019-02-21
Supplement: MOESM2 [file 16497950]

S S S S S S S S S S N P PM

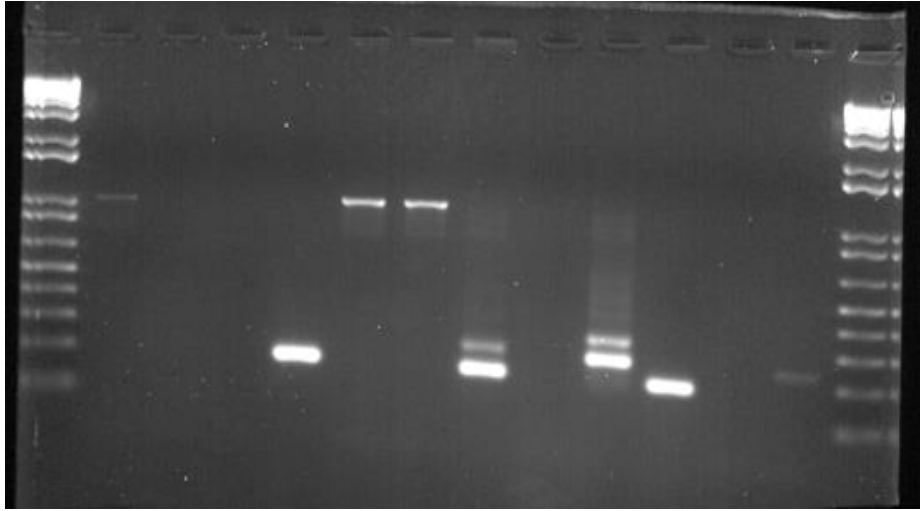

K1 allelic family (*msp-1*)

PM: DNA ladder (HyperLadder 1kb 100 lanes, Bioline); P: positive control;  
N: negative control, S: sample

S S S S S S S S S S N P PM

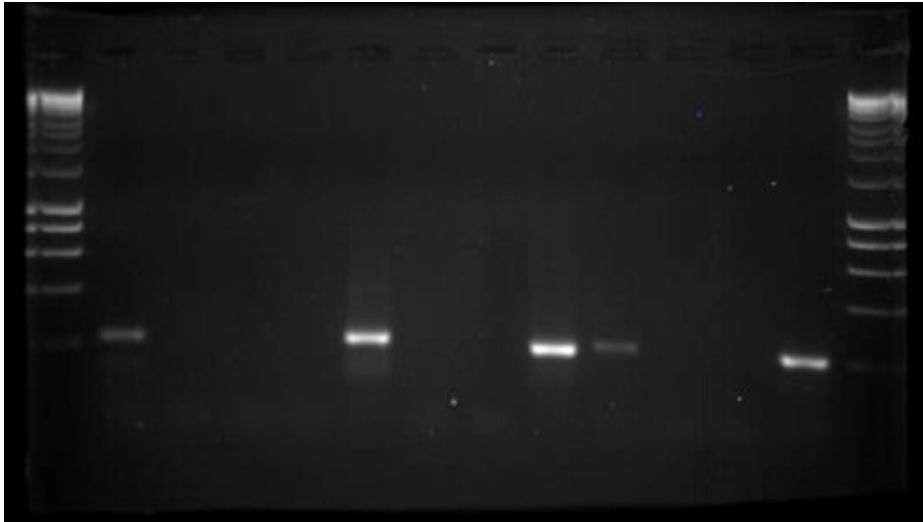

MAD20 allelic family (*msp-1*)

PM: DNA ladder (HyperLadder 1kb 100 lanes, Bioline); P: positive control;  
N: negative control, S: sample

S S S S S S S S S N P PM

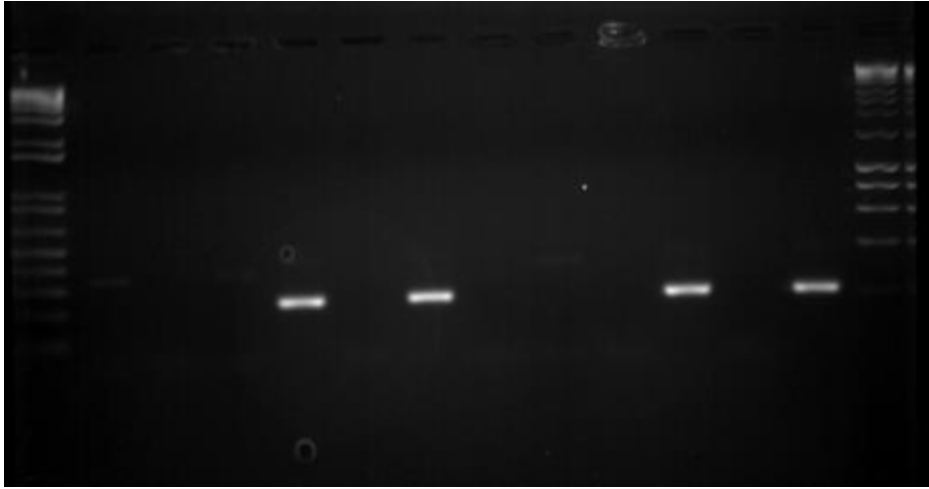

RO33 allelic family (*msp-1*)

PM: DNA ladder (HyperLadder 1kb 100 lanes, Bioline); P: positive control;  
N: negative control, S: sample

S S S S S S S S S N P PM

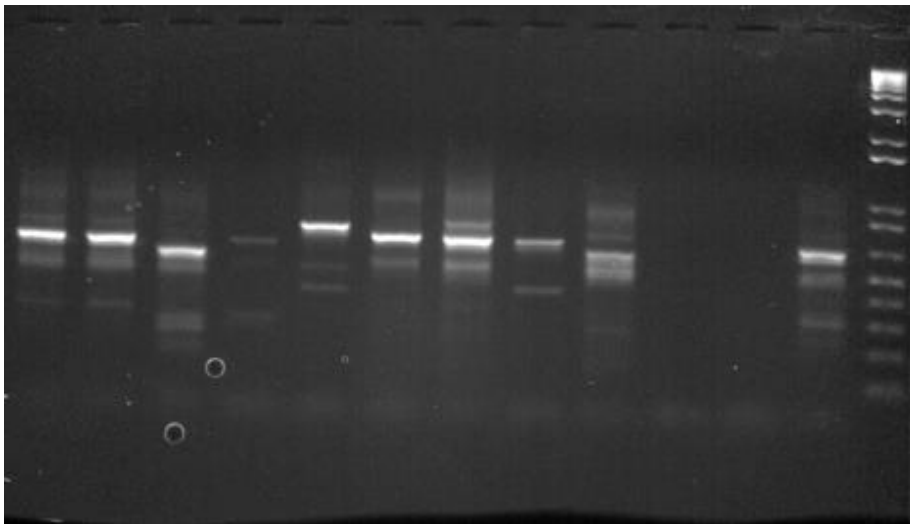

3D7 allelic family (*msp-2*)

PM: DNA ladder (HyperLadder 1kb 100 lanes, Bioline); P: positive control;  
N: negative control, S: sample

S S S S S S S S S S N P PM

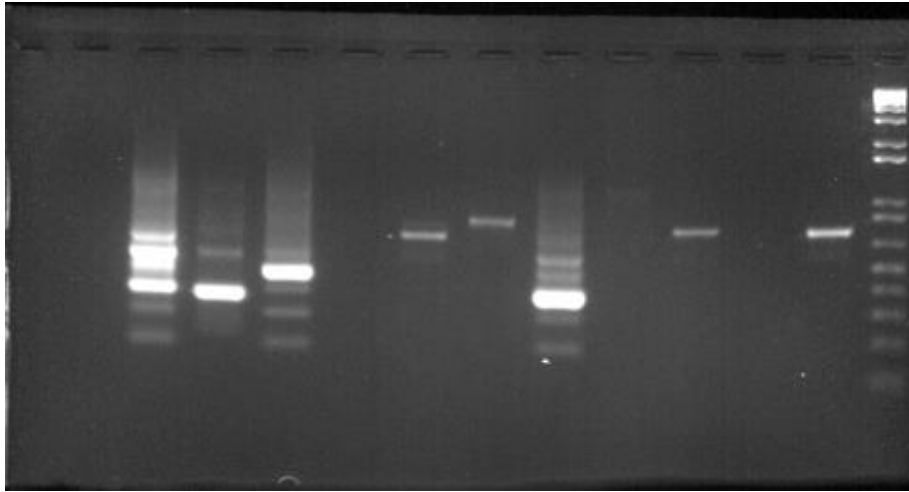

FC27 3D7 allelic family (*msp-2*)

PM: DNA ladder (HyperLadder 1kb 100 lanes, Bioline); P: positive control;

N: negative control, S: sample
