# Supplementary material for: Association of high Plasmodium falciparum parasite densities with polyclonal microscopic infections in asymptomatic children from Toubacouta, Senegal
Source: Springer Nature journal article supplement (doi:10.1186/s12936-019-2684-3), 2019-02-21

Parasitemia's boxplot

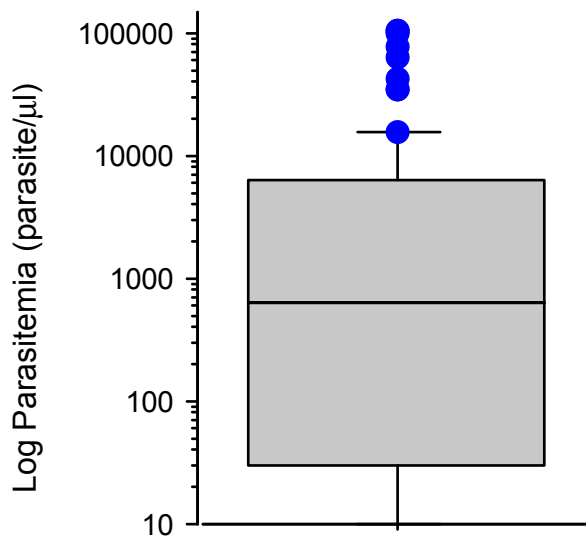

Supplement: MOESM4 [file 16497950]
